# Supplementary material for: Differential miR-346 and miR-582-3p Expression in Association with Selected Maternal and Fetal Complications
Source: MDPI journal article supplement (doi:10.3390/ijms18071570), 2017-07-19
Supplement: s1 [file s1]

Table S1. Characteristics of study participants with term pregnancy (gestational age > 37 weeks)

| Clinical Information                 | Normal control<br>(n = 60) | Preeclampsia<br>(n = 15) | Small for gestational age<br>(n = 11) |
|--------------------------------------|----------------------------|--------------------------|---------------------------------------|
| Maternal age (y)                     | 31.33 ± 4.31               | 35.73 ± 5.64 *           | 32.73 ± 8.24                          |
| Gestational age at delivery (week)   | 38.87 ± 0.99               | 38.36 ± 1.12             | 38.77 ± 0.97                          |
| Ethnicity (Chinese %)                | 100%                       | 100%                     | 89.5%                                 |
| BMI at delivery (Kg/m <sup>2</sup> ) | 26.47 ± 3.55               | 29.12 ± 5.60             | 25.02 ± 3.42                          |
| Neonatal outcome                     |                            |                          |                                       |
| Birth Weight (g)                     | 3136 ± 505.11              | 2991.73 ± 571.86         | 2534.73 ± 244.78 *                    |
| 1 min Apgar score                    | 8.635 ± 0.71               | 8.6 ± 0.74               | 8.55 ± 0.73                           |
| 5 min Apgar score                    | 9.827 ± 0.43               | 9.86 ± 0.35              | 9.89 ± 0.33                           |
| Placenta weight                      | 631.45 ± 113.95            | 603.87 ± 151.64          | 451.55 ± 56.19 *                      |

Data are presented as means ± SD; statistical test: ANOVA with post hoc procedure, and \* denotes p value less than 0.05
